# Supplementary figures and images for: Exploring a link between the Middle Eocene Climatic Optimum and Neotethys continental arc flare-up
Source: Copernicus journal article supplement (doi:10.5194/cp-2020-48), 2020-04-14

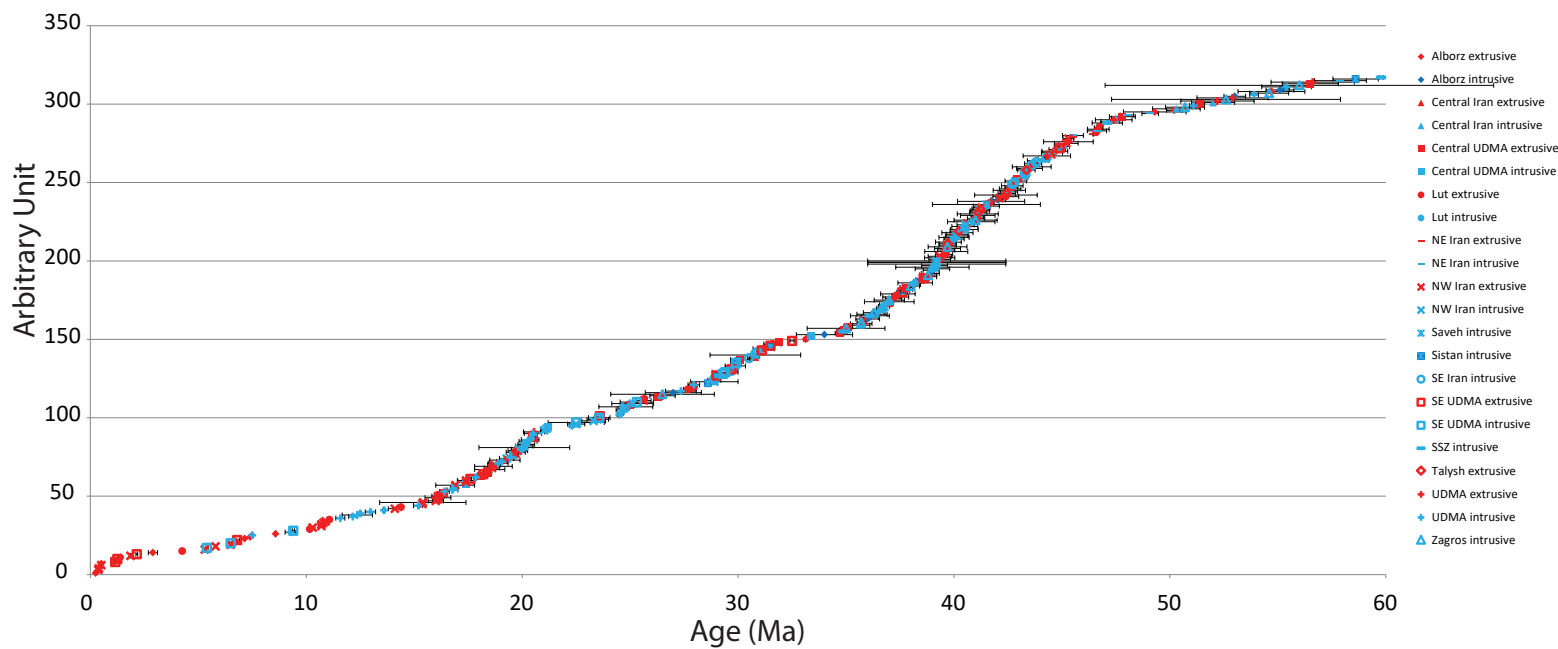

Supplement: Supplementary file 1 [file cp-2020-48-supplement.zip]
